# Supplementary material for: C9orf72 regulates the unfolded protein response and stress granule formation by interacting with eIF2α
Source: Theranostics. 2022 Oct 17;12(17):7289–306. doi: 10.7150/thno.76138 (PMC9691347; doi:10.7150/thno.76138)
Supplement: Supplementary file 1 — Supplementary figures and tables. [file thnov12p7289s1.pdf]

## **Supplementary material for:**

# **C9orf72 regulates the unfolded protein response and stress granule formation by interacting with eIF2 $\alpha$**

Wenzhong Zheng<sup>1#</sup>, Kexin Wang<sup>1#</sup>, Yachen Wu<sup>1#</sup>, Ge Yan<sup>1,3</sup>, Chi Zhang<sup>1,3</sup>, Zhiqiang Li<sup>1</sup>, Lianrong

Wang<sup>1,2\*</sup> & Shi Chen<sup>1,3\*</sup>

#These authors contributed equally

\*For correspondence: Professor Shi Chen, shichen\_2021@163.com; Professor Lianrong Wang, lianrong@whu.edu.cn

This PDF file includes:

Figures S1 to S11

Tables S1 and S2

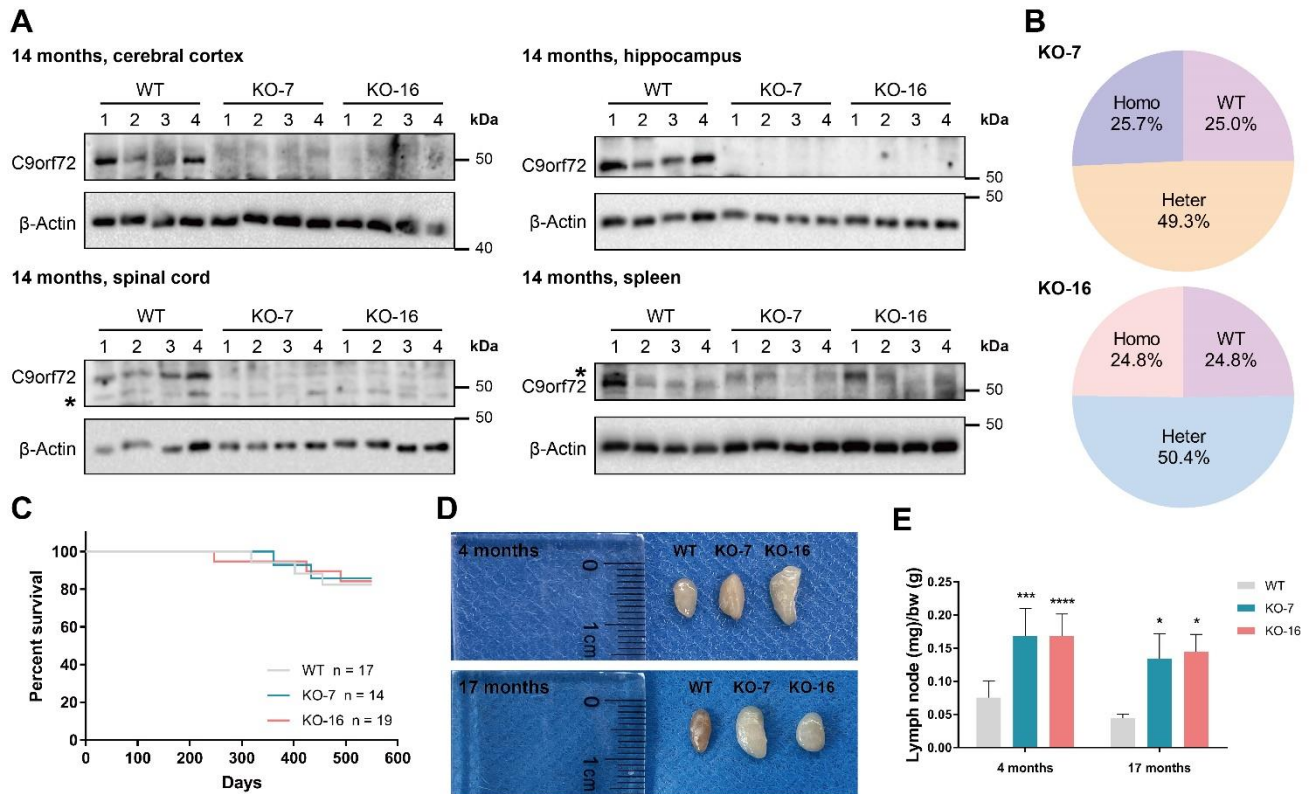

**Figure S1. Gross characterization of C9orf72-KO rats. Related to Figure 1.**

(A) Western blot analyses of C9orf72 protein levels in the cerebral cortex, hippocampus, spinal cord and spleen of 14-month-old WT and C9orf72-KO (KO-7 and KO-16) rats, with  $\beta$ -Actin serving as the loading control. The C9orf72 antibody (customized by GenScript) detected a band at 50 kDa that was not present in the KO-7 and KO-16 lysates. The asterisk (\*) indicates a nonspecific band. (B) Crossing of heterozygous rats produced all genotypes (wildtype, heterozygous and homozygous KO pups) in the expected Mendelian ratio (1:2:1). (C) The survival curve of C9orf72-KO rats did not differ from WT rats up to 550 days. (D) Representative images of cervical lymph nodes from WT and C9orf72-KO rats at the indicated ages. (E) Cervical lymph node weights (in milligrams) normalized to body weight (in grams) at the indicated ages (n = 8 rats of each genotype at the age of 4 months, n = 3

rats of each genotype at the age of 17 months, means  $\pm$  SD, unpaired two-tailed t-test,  $*P \leq 0.05$ ,  $***P \leq 0.001$ , and  $****P \leq 0.0001$ ).

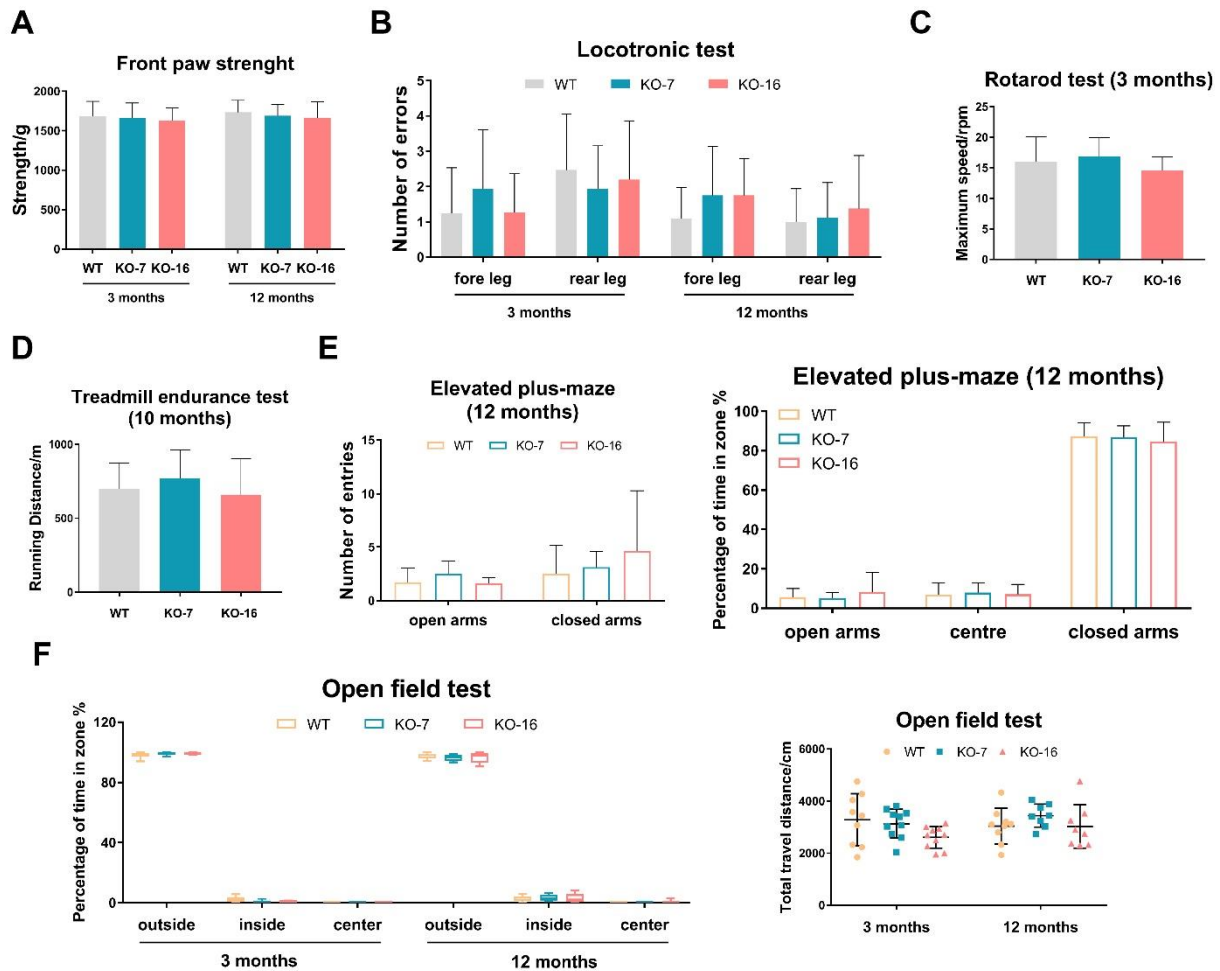

**Figure S2. *C9orf72*-null rats do not develop motor deficits or anxiety-like behavior.**

**(A)** Front paw strength of WT and *C9orf72*-null (KO-7 and KO-16) rats at 3 months and 12 months. **(B)** Number of errors in WT and *C9orf72*-null (KO-7 and KO-16) rats at 3 months and 12 months in the locotronic test. **(C)** Maximum rotarod speed of 3-month-old WT and *C9orf72*-null (KO-7 and KO-16) rats. **(D)** Running distance of 10-month-old WT and *C9orf72*-null (KO-7 and KO-16) rats in the treadmill endurance test. **(E)** Number of entries into open arms and closed arms (left panel) and percentages of time spent in the three regions (right panel) among 12-month-old WT and *C9orf72*-null (KO-7 and KO-16) rats in the elevated plus-

maze test. **(F)** Percentage of time spent in the three regions (left panel) and total traveling distance (right panel) among WT and *C9orf72*-null (KO-7 and KO-16) rats at 3 months and 12 months in the open field test. In (A-F), data are presented as means  $\pm$  SD ( $n \geq 8$  rats of each genotype at each time point, unpaired two-tailed t-test).

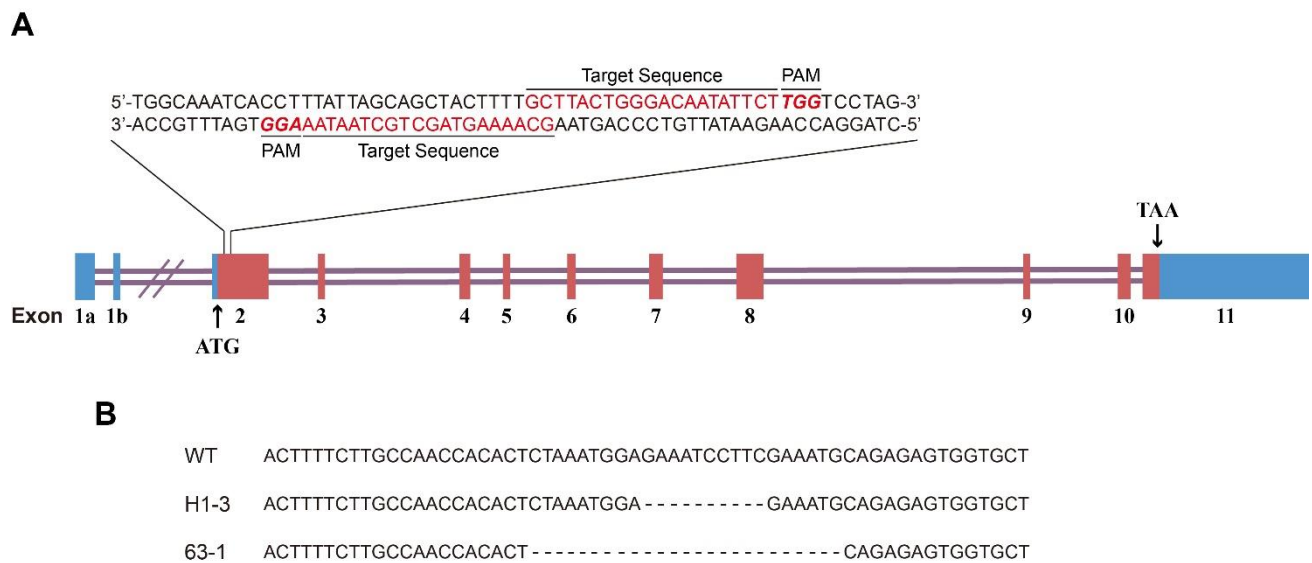

**Figure S3. CRISPR/Cas9 gene editing technology was used to knock out *C9orf72* in HCT116 cells.**

**(A)** Schematic of the human *C9orf72* gene structure, and the targeted sequences for CRISPR/Cas9 editing (the underlined sequences). The protospacer adjacent motif (PAM) sequences are indicated by italicized and bolded letters. **(B)** Alignment of sequences from the WT and *C9orf72*-KO (H1-3 and 63-1) cell lines. The deleted sequences in the *C9orf72*-KO (H1-3 and 63-1) cell lines were located downstream of the Cas9 cleavage sites.

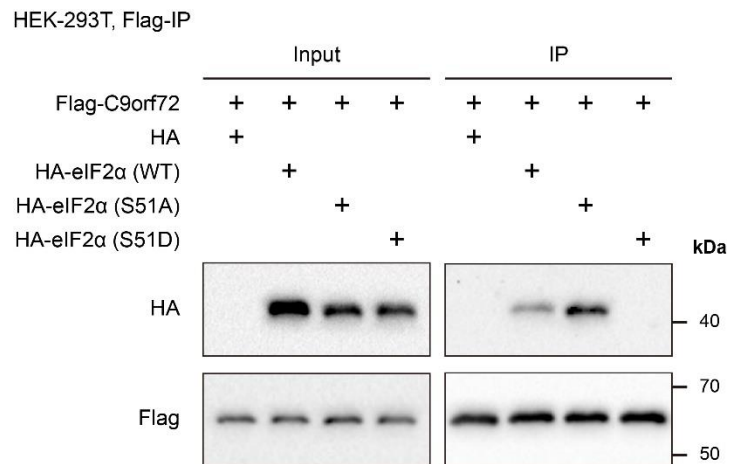

**Figure S4.** The levels of the nonphosphorylatable eIF2α (S51A) bound to C9orf72 were higher than those of the phosphomimetic eIF2α (S51D) bound to C9orf72. Related to **Figure 2**.

Flag-C9orf72 (long isoform) was co-expressed with the indicated HA-tagged protein in HEK-293T cells and IP was performed using Flag antibody pre-coupled to Protein A/G magnetic beads, followed by western blot analysis using antibodies against Flag or HA. eIF2α (WT), wild-type eIF2α; eIF2α (S51A), the nonphosphorylatable form of eIF2α; eIF2α (S51D), the phosphomimetic form of eIF2α.

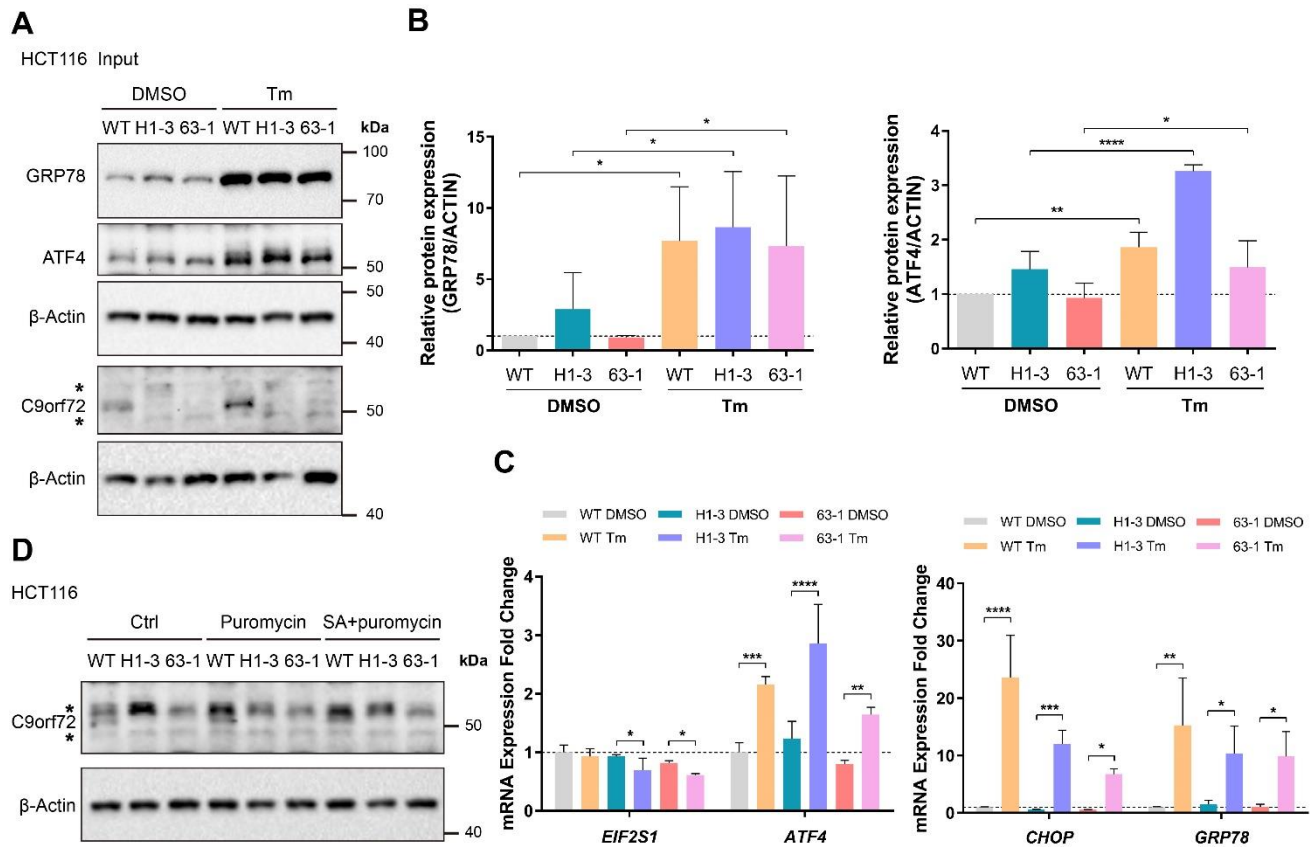

**Figure S5. Tm induces ER stress in HCT116 cells. Related to Figure 3.**

**(A)** Western blot analysis of GRP78 and ATF4 levels in either the DMSO- or Tm (1  $\mu$ g/mL for 24 h)-treated WT and *C9orf72*<sup>-/-</sup> (H1-3 and 63-1) HCT116 cell lines (the input samples were obtained from the endogenous eIF2 $\alpha$  IP assays shown in Figure 3A). The loss of the C9orf72 protein in *C9orf72*<sup>-/-</sup> cell lines (H1-3 and 63-1) was detected by western blotting with an anti-C9orf72 antibody (customized by GenScript). **(B)** Densitometry quantification of GRP78 (left panel) and ATF4 (right panel) levels based on the western blot results ( $n = 3$  independent experiments, means  $\pm$  SD, two-way ANOVA with Fisher's LSD test, \* $P \leq 0.05$ , \*\* $P \leq 0.01$ , and \*\*\*\* $P \leq 0.0001$ ). **(C)** RT-qPCR assay of *EIF2S1*, *ATF4*, *CHOP*, and *GRP78* mRNA expression

in WT, H1-3 and 63-1 cell lines treated with either vehicle (DMSO) or Tm (n = 3 independent experiments, means  $\pm$  SD, two-way ANOVA with Fisher's LSD test,  $^*P \leq 0.05$ ,  $^{**}P \leq 0.01$ ,  $^{***}P \leq 0.001$ , and  $^{****}P \leq 0.0001$ ). **(D)** Western blot analysis of C9orf72 protein levels in the Ctrl group (untreated HCT116 cell lines, negative control), Puromycin group (HCT116 cell lines treated with 3  $\mu$ g/mL puromycin for 30 min) and SA + puromycin group (HCT116 cell lines cotreated with 0.2 mM SA and 3  $\mu$ g/mL puromycin for 30 min).  $\beta$ -Actin was used as a loading control. The asterisk (\*) indicates a nonspecific band.

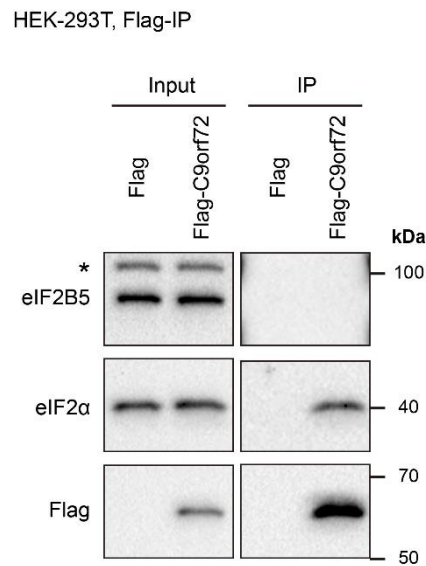

**Figure S6. eIF2B5 is not pulled down together with eIF2 $\alpha$  when immunoprecipitating Flag-C9orf72. Related to Figure 3.**

Lysates were prepared from HEK-293T cells overexpressing Flag-tag or Flag-C9orf72 (long isoform). Flag-tagged proteins were immunoprecipitated with a Flag antibody pre-coupled to Protein A/G magnetic beads, followed by western blot analyses using antibodies against Flag, eIF2 $\alpha$  or eIF2B5.

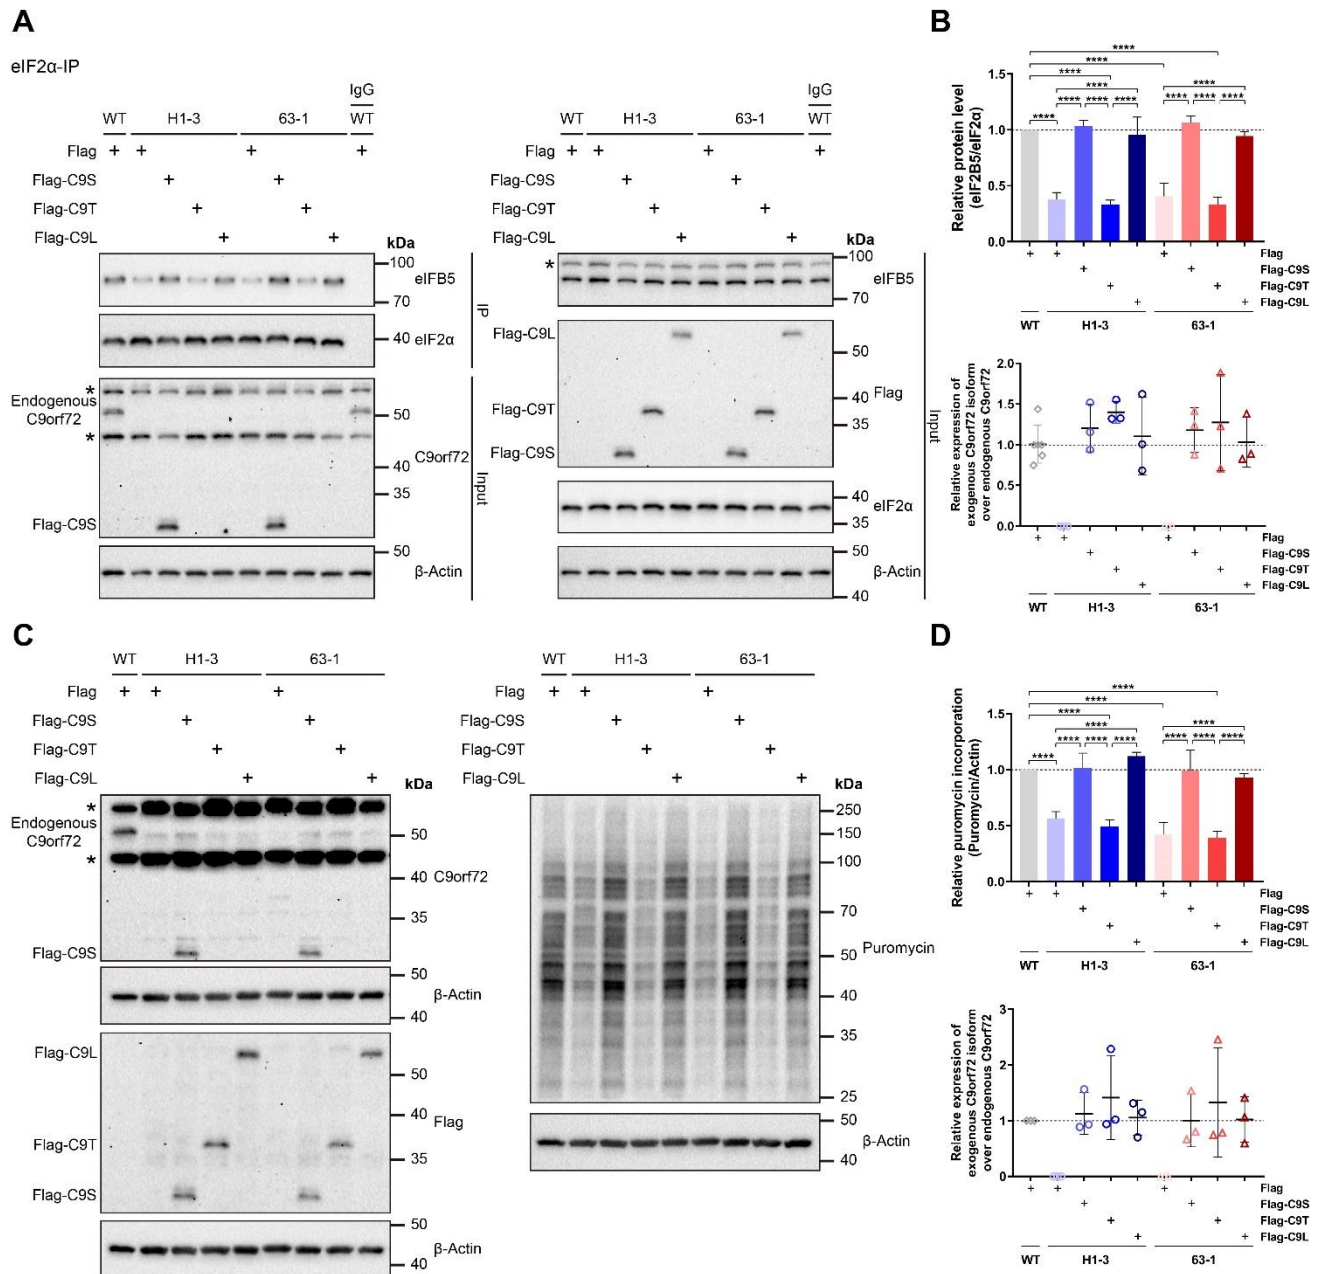

**Figure S7. Reconstitution with C9S or C9L restores the interaction of eIF2 $\alpha$  with eIF2B5 and the global translation levels of *C9orf72*<sup>-/-</sup> HCT116 cells. Related to Figure 3.**

**(A)** Lysates were prepared from WT or *C9orf72*<sup>-/-</sup> (H1-3 and 63-1) HCT116 cells expressing the indicated Flag-tagged proteins. Endogenous eIF2 $\alpha$  was immunoprecipitated with an eIF2 $\alpha$  antibody pre-coupled to Protein A/G magnetic beads followed by western blot analyses

using antibodies against eIF2α or eIF2B5. The levels of endogenous C9orf72 and exogenous Flag-tag proteins in the input samples were also determined using western blotting. The asterisk (\*) indicates a nonspecific band. **(B)** Relative ratio of eIF2B5 to eIF2α (upper panel) and relative ratio of the exogenous Flag-tag C9orf72 isoform to endogenous C9orf72 (lower panel) based on the western blot results (A) (n = 3 independent experiments, means ± SD, two-way ANOVA and followed by Tukey's post hoc test, \*\*\*\* $P \leq 0.0001$ ). **(C)** WT and *C9orf72*<sup>-/-</sup> (H1-3 and 63-1) HCT116 cells were transfected with the indicated plasmids. The cells were treated with 3 µg/mL puromycin for 30 min. Then, puromycin incorporation and the levels of endogenous C9orf72 and exogenous Flag-tag proteins were determined using western blotting. The asterisk (\*) indicates a nonspecific band. **(D)** Quantification of puromycin incorporation (upper panel) and the relative ratio of exogenous Flag-tag C9orf72 isoform to endogenous C9orf72 (lower panel) based on the western blot results (C) (n = 3 independent experiments, means ± SD, two-way ANOVA and followed by Tukey's post hoc test, \*\*\*\* $P \leq 0.0001$ ).

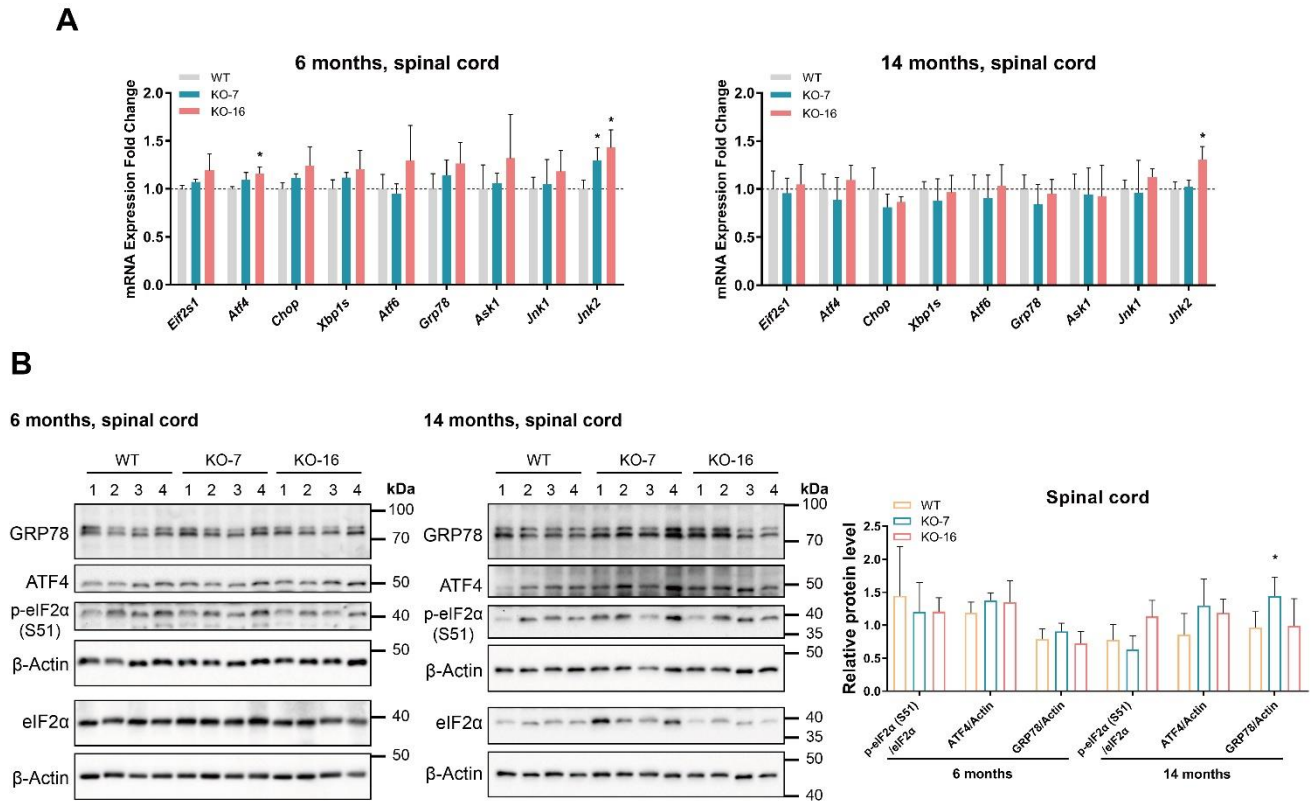

**Figure S8. Loss of C9orf72 does not induce ER stress in the rat spinal cord. Related to Figure 4.**

**(A)** Analyses of the mRNA expression of genes involved in ER stress pathways in the spinal cord from 6-month-old (left panel) and 14-month-old (right panel) male WT, KO-7 and KO-16 rats ( $n = 3$  rats of each genotype, means  $\pm$  SD, unpaired two-tailed t-test,  $*P \leq 0.05$ ). **(B)** Western blot analyses of ER stress marker (the ratio of p-eIF2 $\alpha$  (S51) to eIF2 $\alpha$ , ATF4 and GRP78) levels in the spinal cords of 6-month-old (left panel) and 14-month-old (middle panel) male WT, KO-7 and KO-16 rats. The quantification of western blot results is shown in the charts on the right ( $n = 4$  rats of each genotype, means  $\pm$  SD, unpaired two-tailed t-test,  $*P \leq 0.05$ ).  $\beta$ -Actin was used as a loading control.

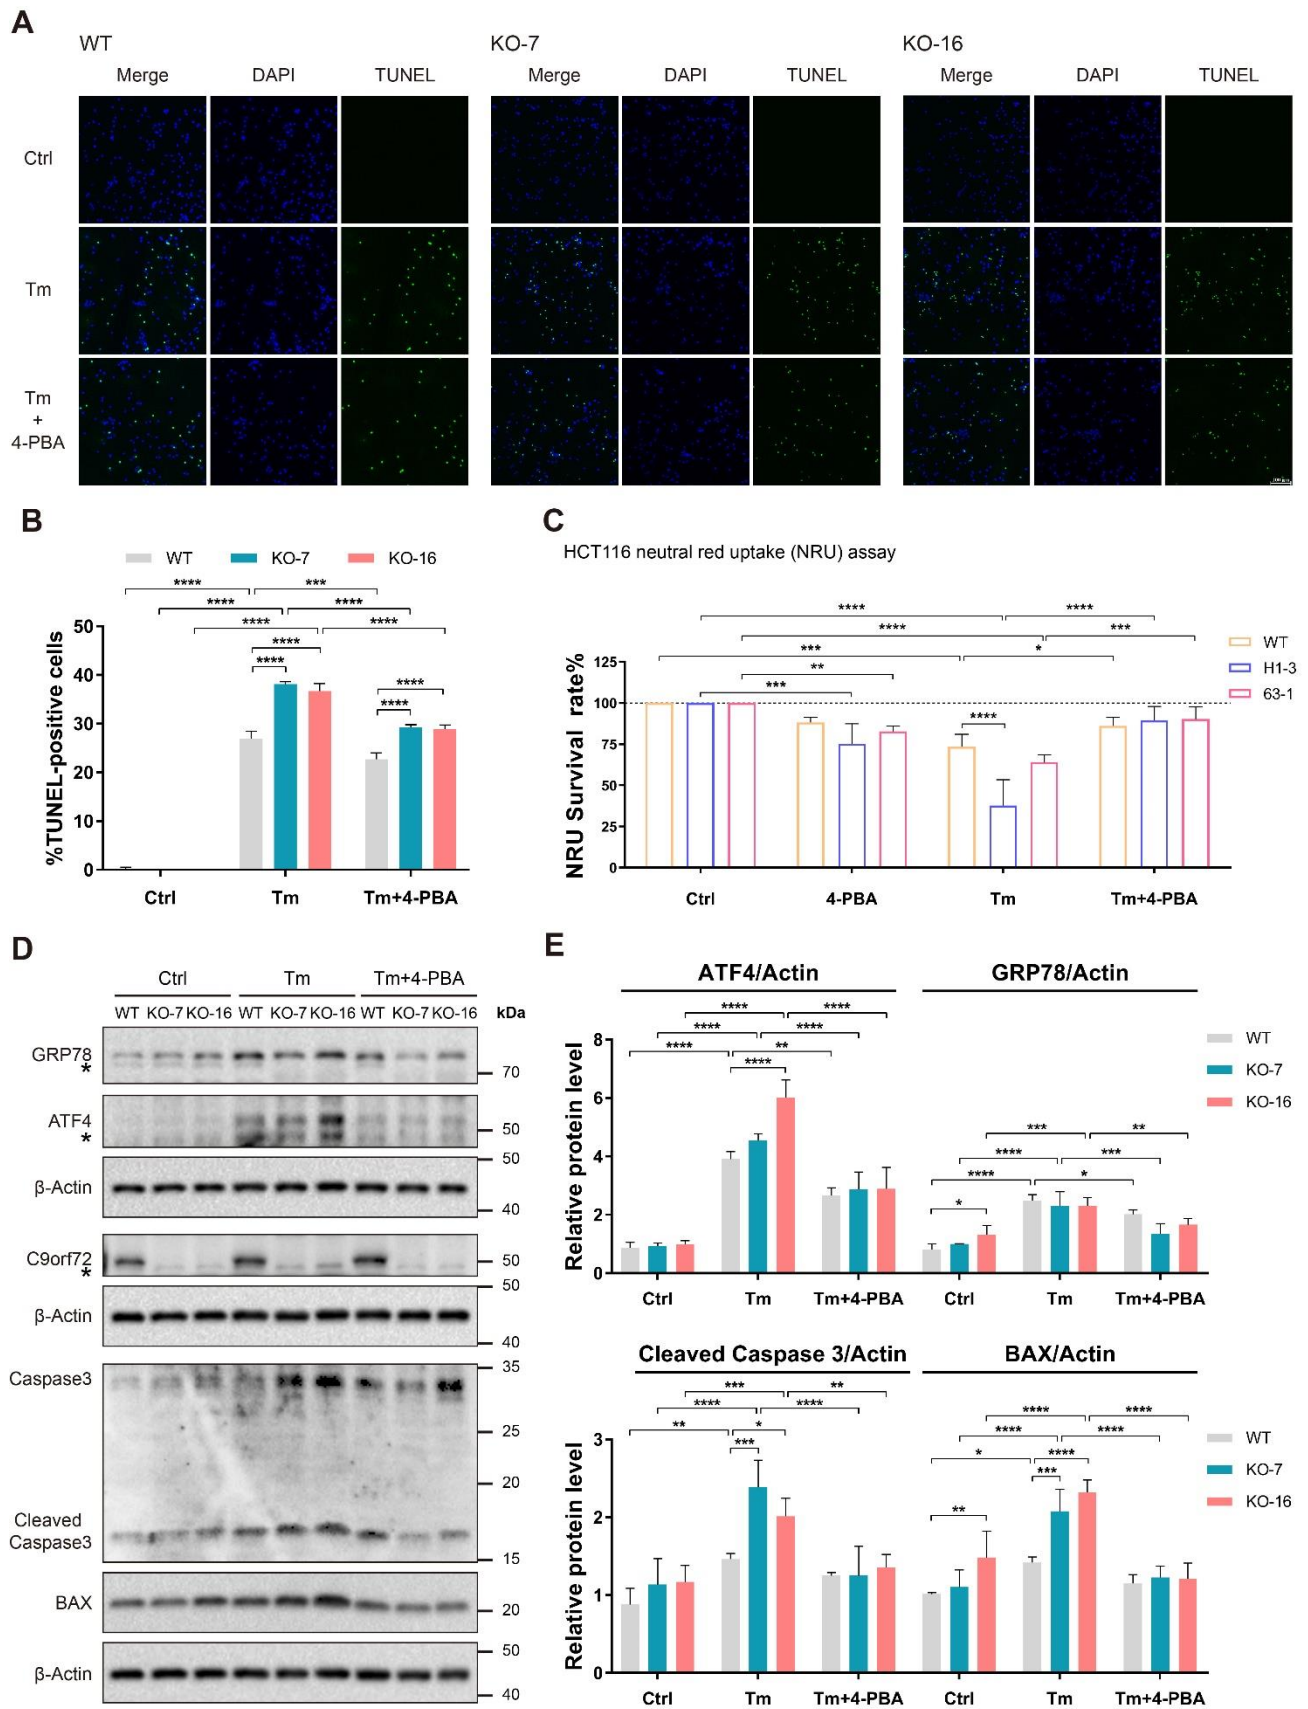

**Figure S9. ER stress induced by Tm increases apoptosis in *C9orf72*-null rat primary cerebral cortical neurons and HCT116 cells.**

**(A)** TUNEL staining of 10-day primary rat cerebral cortical neurons treated with Tm (5  $\mu$ g/mL for 12 h) and/or 4-PBA (8 mM for 24 h). All cells are stained blue with DAPI, and apoptotic cells are stained green with TUNEL. Scale bars: 100  $\mu$ m. **(B)** Quantification of the percentage of TUNEL-positive cells in (A); 924–2439 cells were counted under each condition. ( $n = 3$  independent experiments, means  $\pm$  SD, two-way ANOVA and followed by Tukey's post hoc test, \*\*\* $P \leq 0.001$  and \*\*\*\* $P \leq 0.0001$ ). **(C)** HCT116 cell survival rate in the NRU assay. Cells were incubated with Tm (1  $\mu$ g/mL, 16 h) and/or 4-PBA (3 mM, 24 h) ( $n = 3$  independent experiments, means  $\pm$  SD, two-way ANOVA with Fisher's LSD test, \* $P \leq 0.05$ , \*\* $P \leq 0.01$ , \*\*\* $P \leq 0.001$ , and \*\*\*\* $P \leq 0.0001$ ). **(D)** GRP78, ATF4, C9orf72, cleaved Caspase3 and BAX expression levels were analyzed using western blotting in 10-day primary rat cerebral cortical neurons treated with Tm (5  $\mu$ g/mL for 12 h) and/or 4-PBA (8 mM for 24 h).  $\beta$ -Actin was used as an internal reference. **(E)** Relative levels of ATF4, GRP78, cleaved Caspase3 and BAX based on the western blot results (D) ( $n = 3$  independent experiments, means  $\pm$  SD, two-way ANOVA with Fisher's LSD test, \* $P \leq 0.05$ , \*\* $P \leq 0.01$ , \*\*\* $P \leq 0.001$ , and \*\*\*\* $P \leq 0.0001$ ). The asterisk (\*) indicates a nonspecific band.

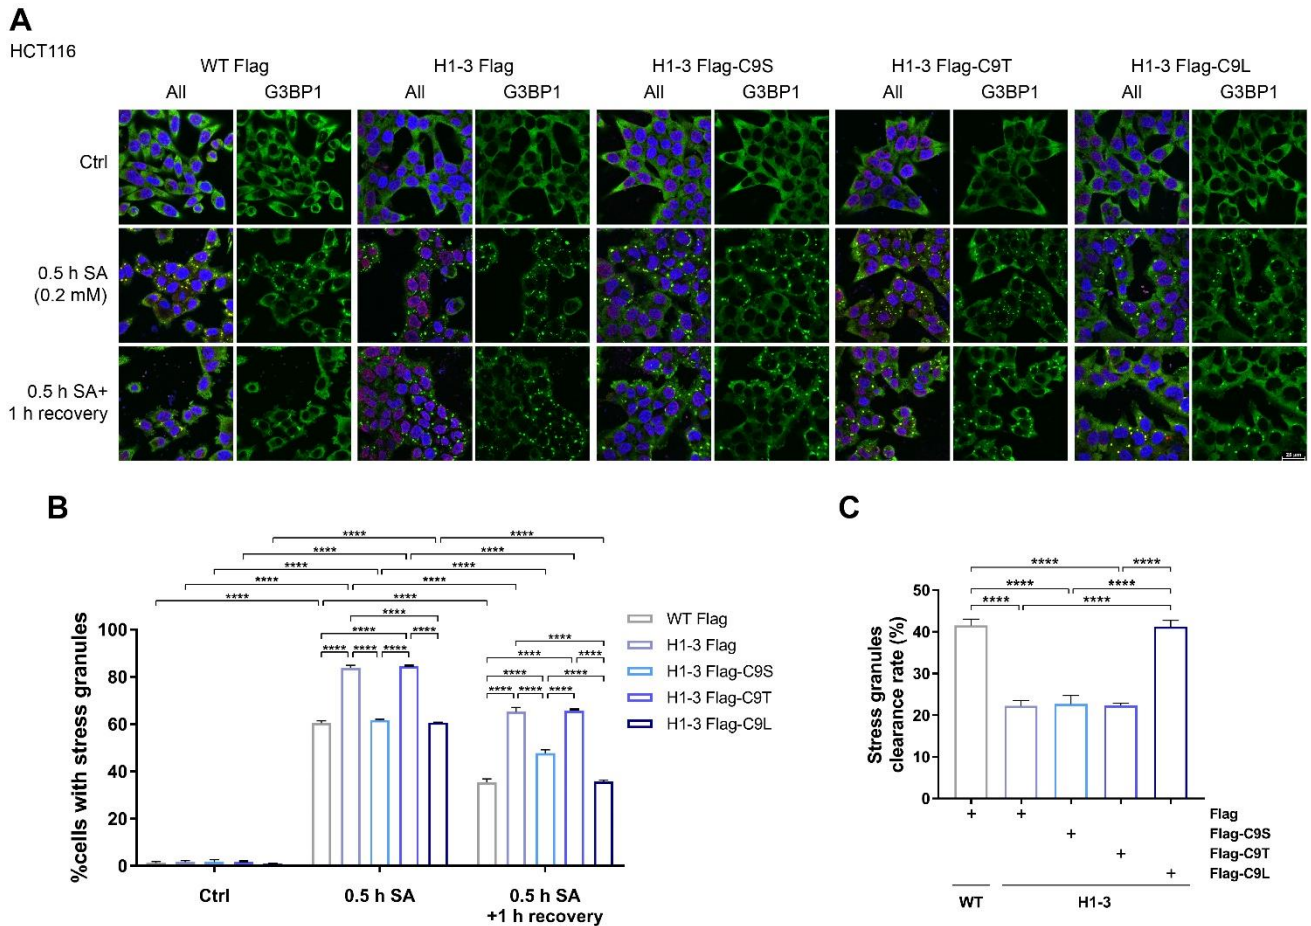

**Figure S10. Reconstitution with C9S or C9L decreases SG formation and reconstitution with C9L increases the clearance of SGs in *C9orf72*<sup>-/-</sup> HCT116 cells. Related to Figure 6.**

**(A)** Images of immunofluorescence staining of WT and *C9orf72*<sup>-/-</sup> (H1-3) HCT116 cells expressing Flag-tagged proteins treated with SA (0.2 mM) for 0.5 h with or without one hour of recovery after the removal of SA. DAPI (blue) labels the nucleus, G3BP1 (green) labels SGs, and Flag (red) labels Flag-tagged proteins. Scale bars: 25  $\mu$ m. **(B)** Quantification of the percentage of cells containing SGs in HCT116 cells expressing with Flag-tagged proteins in (A) ( $n = 3$  independent experiments, means  $\pm$  SD, two-way ANOVA and followed by Tukey's

post hoc test, \*\*\*\* $P \leq 0.0001$ ); 124–212 cells were counted per condition. **(C)** Quantification of the SG clearance rate calculated from (B) ( $n = 3$  independent experiments, means  $\pm$  SD, two-way ANOVA and followed by Tukey's post hoc test, \*\*\*\* $P \leq 0.0001$ ).

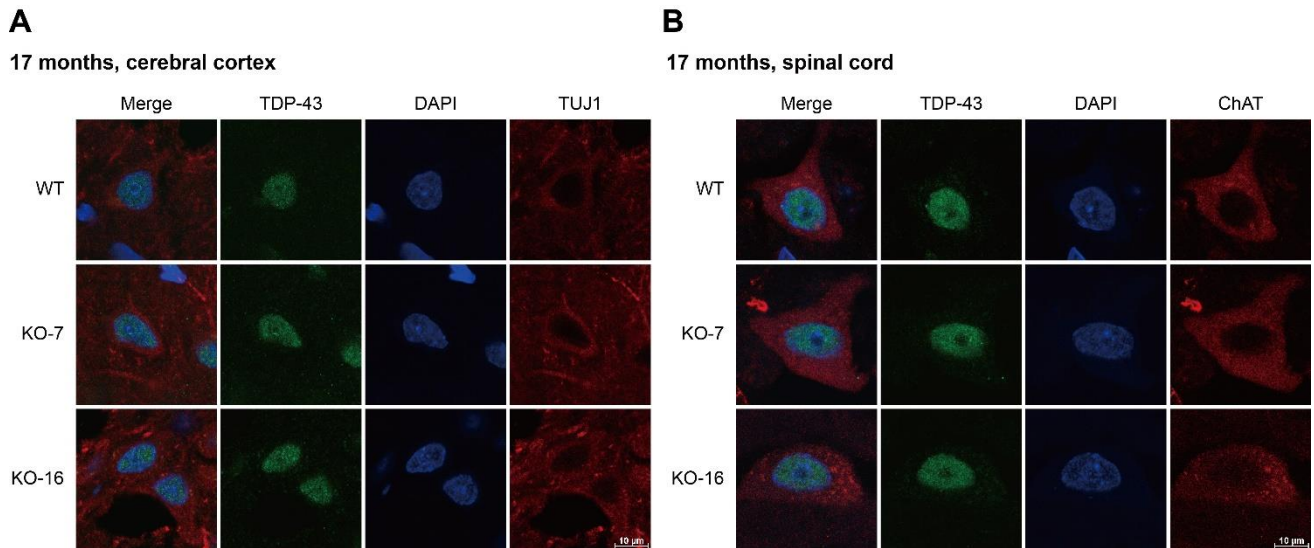

**Figure S11. Loss of C9orf72 does not cause TDP-43 mislocalization in 17-month-old rat cerebral cortical neurons and spinal motor neurons.**

**(A)** Immunofluorescence staining of the 17-month-old rat cerebral cortex labeled with endogenous TDP-43 (green) and the neuronal marker TUJ1 (red). Nuclei were counterstained with DAPI (blue). Scale bars: 10  $\mu$ m. **(B)** Immunofluorescence staining of the 17-month-old rat spinal cord labeled with endogenous TDP-43 (green) and the motor neuron marker ChAT (red). Nuclei were counterstained with DAPI (blue). Scale bars: 10  $\mu$ m.

**Table S1. Primers used to construct GST-tagged and MBP-tagged protein expression vectors, pCS2-G3BP1-mCherry and pcDNA3.1-Flag-tagged vectors, related to the experimental procedures.**

| <b>Primer name</b>    | <b>Primer sequence (5'-3')</b>    |
|-----------------------|-----------------------------------|
| GST-C9S forward       | CGGGATCCATGTCGACTCTTTGCCCACC      |
| GST-C9S reverse       | CCGCTCGAGTTACTTGAGAAGAAAGCCTTC    |
| GST-C9L forward       | CGGGATCCATGTCGACTCTTTGCCCACC      |
| GST-C9L reverse       | CCGCTCGAGTTAAAAAGTCATTAGAACATC    |
| GST-C9T forward       | CGGGATCCTGTCATGAAGGCTTTCTTCTC     |
| GST-C9T reverse       | CCGCTCGAGTTAAAAAGTCATTAGAACATCTCG |
| MBP-eIF2S1 forward    | CCGGAATTCATGCCGGGTCTAAGTTGTAG     |
| MBP-eIF2S1 reverse    | CGCGGTACCTTAATCTTCAGCTTTGGCTTCC   |
| G3BP1-mCherry forward | AAGCTTGCCACCATGGTGATGGAGAAGCCTAGT |
| G3BP1-mCherry reverse | TCTAGACTATTACTTGTACAGCTCGTCCATGCC |
| Flag-C9S forward      | ATCGGATCCATGTCGACTCTTTGCCCACC     |
| Flag-C9S reverse      | CGCGAATTCTTACTTGAGAAGAAAGCCTT     |
| Flag-C9L forward      | ATCGGATCCATGTCGACTCTTTGCCCACC     |
| Flag-C9L reverse      | CGCGAATTCTTAAAAAGTCATTAGAACATCTC  |
| Flag-C9T forward      | CGGGATCCTGTCATGAAGGCTTTCTTCTC     |
| Flag-C9T reverse      | CGCGAATTCTTAAAAAGTCATTAGAACATCTC  |

**Table S2. Primer sequences used for semiquantitative and quantitative RT-PCR.**

| <b>Gene</b>    | <b>Forward primer sequence<br/>(5'-3')</b> | <b>Reverse primer sequence<br/>(5'-3')</b> | <b>Use</b> |
|----------------|--------------------------------------------|--------------------------------------------|------------|
| <i>hEIF2S1</i> | TGATTGAAGAAGTCGGCT<br>CTGG                 | GACATAAGCCCCCATTTT<br>AGC                  | RT-qPCR    |
| <i>hATF4</i>   | CTTCACCTTCTTACAACCT<br>CTTCCC              | GTGTAGTCTGGCTTCCTA<br>TCTCC                | RT-qPCR    |
| <i>hCHOP</i>   | CAGAACCAGCAGAGGTCA<br>CA                   | CTAGCTGTGCCACTTTCC<br>TTTC                 | RT-qPCR    |
| <i>hGRP78</i>  | GACGGGCAAAGATGTCAG<br>GA                   | GCCCGTTTGGCCTTTTCT<br>AC                   | RT-qPCR    |
| <i>hGAPDH</i>  | AGGTCGGAGTCAACGGAT<br>TTG                  | TGACAAGCTTCCCGTTCT<br>CAG                  | RT-qPCR    |
| <i>rEif2s1</i> | GCTTGCTATGGTTACGAA<br>GGC                  | CATCACATACCTGGGTGG<br>AG                   | RT-qPCR    |
| <i>rAtf4</i>   | TCTGTATGAGCCCTGAGT<br>CCTACCT              | GGTCATAAGGTTTGGGTC<br>GAGAACCAC            | RT-qPCR    |
| <i>rChop</i>   | CCTGAAAGCAGAAACCGG<br>TC                   | CCTCATACCAGGCTTCCA<br>GC                   | RT-qPCR    |
| <i>rXbp1s</i>  | GAGTCCGCAGCAGGTGC                          | GGTCCAACCTTGTCCAGAA<br>TGC                 | RT-qPCR    |
| <i>rAtf6</i>   | CGAGGGAGAGGTGTCTGT<br>TTC                  | GTCTTCACCTGGTCCATG<br>AGG                  | RT-qPCR    |
| <i>rGrp78</i>  | CCTATTCCTGCGTCGGTG<br>TATT                 | GGTTGGACGTGAGTTGGT<br>TC                   | RT-qPCR    |

|               |                            |                             |                     |
|---------------|----------------------------|-----------------------------|---------------------|
| <i>rAsk1</i>  | TGACACCACACAACAAGG<br>TCT  | CGAGAGGTAAGCAGATCG<br>GC    | RT-qPCR             |
| <i>rJnk1</i>  | ACAGAGCACCAGAGGTCA<br>TTC  | GGCAAACCATTCTCCCA<br>TAATGC | RT-qPCR             |
| <i>rJnk2</i>  | TGCCGATGAAACCTCGCA<br>G    | ACGCAGGCAATCCTACTG<br>G     | RT-qPCR             |
| <i>rTrem2</i> | TCCTGTTGCTGGTCACAG<br>AG   | CTCCCATTCTGCTTCCTCA<br>G    | RT-qPCR             |
| <i>rIi-1a</i> | GAGATTCCGGAAACACCA<br>AA   | GAAAGCTGCGGATGTGAA<br>GT    | RT-qPCR             |
| <i>rCcl3</i>  | CATGGCGCTCTGGAACGA<br>A    | TGCCGTCCATAGGAGAAG<br>CA    | RT-qPCR             |
| <i>rCcl9</i>  | GGCCCACCAGGAGGATG<br>AA    | TCTGTCGCATGTACGATC<br>TGG   | RT-qPCR             |
| <i>rIi-1b</i> | CCTATGTCTTGCCCGTGG<br>AG   | CACACACTAGCAGGTCGT<br>CA    | RT-qPCR             |
| <i>rCxcr1</i> | CGTTCTGGAACAGTCTGC<br>TATG | CGGCAAGAGGAAGCCAAA<br>TA    | RT-PCR              |
| <i>rGapdh</i> | GGAAAGCTGTGGCGTGAT         | AAGGTGGAAGAATGGGAG<br>TT    | RT-PCR &<br>RT-qPCR |
